# Supplementary material for: Effects of Diet on the Microbiome and Serum Metabolome of South Asian Infants at 1 Year
Source: bioRxiv or medRxiv preprint supplement (doi:10.1101/2021.09.28.21264268), 2021-09-30
Supplement: Supplementary file [file media-1.pdf]

**Table S1.** DESeq2 results for adherence to the formula and dairy dietary pattern (high vs. low)

|                                      | <b>Base Mean</b> | <b>Log2 Fold Change</b> | <b>Std Err.</b> | <b>p</b> | <b>FDR adj p</b> |
|--------------------------------------|------------------|-------------------------|-----------------|----------|------------------|
| ASV266 <i>Enterobacteriaceae</i>     | 7.84             | 22.03                   | 1.71            | 6.02E-38 | 9.80E-36         |
| ASV138 <i>Enterobacter</i>           | 19.61            | 4.97                    | 1.68            | 0.003    | 0.038            |
| ASV46 <i>Lactococcus</i>             | 115.84           | 4.36                    | 0.99            | 1.01E-05 | 2.74E-04         |
| ASV6 <i>Blautia</i>                  | 3856.83          | 1.81                    | 0.53            | 7.01E-04 | 0.010            |
| ASV100 <i>Erysipelatoclostridium</i> | 82.74            | 1.77                    | 0.50            | 3.93E-04 | 0.006            |
| ASV157 <i>Lactobacillus</i>          | 64.77            | -8.84                   | 1.29            | 7.94E-12 | 6.47E-10         |
| ASV184 <i>Lactobacillus</i>          | 10.98            | -8.80                   | 1.68            | 1.61E-07 | 6.55E-06         |
| ASV68 <i>Lactobacillus</i>           | 99.37            | -7.43                   | 1.92            | 1.04E-04 | 0.002            |
| ASV304 <i>Megasphaera</i>            | 16.62            | -7.30                   | 1.46            | 5.45E-07 | 1.78E-05         |
| ASV161 <i>Lactobacillus</i>          | 18.40            | -6.64                   | 1.75            | 1.45E-04 | 0.003            |
| ASV8 <i>Bifidobacterium</i>          | 3005.68          | -4.09                   | 1.12            | 2.46E-04 | 0.004            |
| ASV60 <i>Veillonella</i>             | 163.39           | -3.56                   | 0.90            | 7.99E-05 | 0.002            |
| ASV67 <i>Veillonella</i>             | 195.07           | -2.50                   | 0.87            | 0.004    | 0.047            |
| ASV11 <i>Bifidobacterium</i>         | 4104.51          | -2.48                   | 0.43            | 1.05E-08 | 5.70E-07         |
