# Supplementary material for: Effects of Diet on the Microbiome and Serum Metabolome of South Asian Infants at 1 Year
Source: bioRxiv or medRxiv preprint supplement (doi:10.1101/2021.09.28.21264268), 2021-09-30
Supplement: Supplementary file [file media-3.pdf]

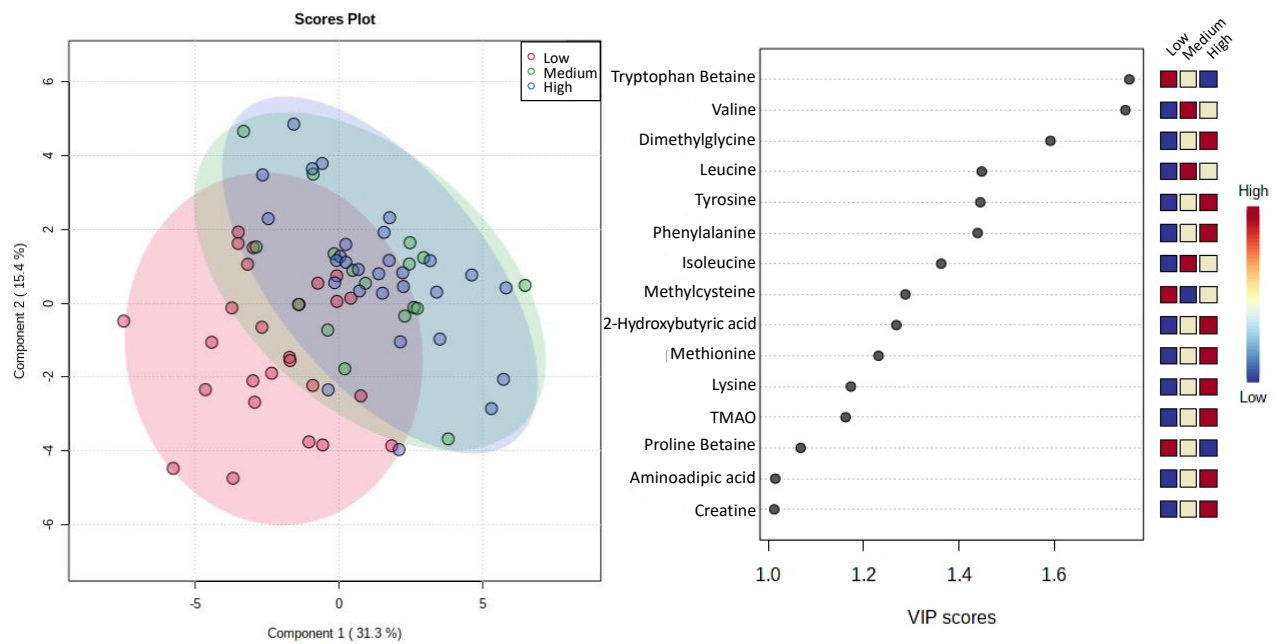

**Figure S1.** PLS-DA of adherence to the formula and dairy diet pattern. Serum metabolite profiles for participants ( $n = 72$ ) were generalized log-transformed and auto-scaled prior to PLS-DA production. Participant profiles were grouped into 3 tertiles of adherence to the formula and dairy diet pattern and are coloured based on this adherence, as well as grouped via 95% confidence interval. Metabolites responsible for the generation for the PLS-DA projection are listed on the right, with variable importance in projection (VIP) scores shown on the x-axis, as well as concentration of the metabolites with each adherence group.
