# Supplementary material for: Effects of Diet on the Microbiome and Serum Metabolome of South Asian Infants at 1 Year
Source: bioRxiv or medRxiv preprint supplement (doi:10.1101/2021.09.28.21264268), 2021-09-30
Supplement: Supplementary file [file media-5.pdf]

**Table S3.** Maternal and Infant Participant Characteristics for serum metabolite analysis.

| <b>Maternal Characteristics:</b>                |                        |                        |
|-------------------------------------------------|------------------------|------------------------|
|                                                 | START (n=72)           | CHILD (n = 81)         |
| Antibiotic usage during labour                  |                        |                        |
| Yes                                             | 33(45.8%)              | 33(40.7%)              |
| No                                              | 36(50.0%) <sup>b</sup> | 44(54.3%) <sup>b</sup> |
| Vegetarian Status                               |                        |                        |
| Yes                                             | 31(43.1%)              | 3(3.7%)                |
| No                                              | 40(55.6%) <sup>b</sup> | 78(96.3%)              |
| GDM                                             |                        |                        |
| Yes                                             | 8(11.1%)               | 6(7.4%)                |
| No                                              | 64(88.9%)              | 75(92.6%)              |
| Years in Canada (SD)                            | 5.7(4.2)               | 29.44(8.4)             |
| <b>Infant Characteristics:</b>                  |                        |                        |
| Age in months at time of sample collection (SD) | 12.14(1.27)            | 12.15(1.50)            |
| Participant Sex                                 |                        |                        |
| Male                                            | 34(47.2%)              | 49(60.5%)              |
| Female                                          | 38(52.8%)              | 32(39.5%)              |
| Delivery Mode                                   |                        |                        |
| Vaginal                                         | 49(68.1%)              | 63(77.8%)              |
| C-Section (planned)                             | 9(12.5%)               | 9(11.1%)               |
| C-Section (emergency)                           | 13(18.1%) <sup>b</sup> | 6(7.4%) <sup>b</sup>   |
| Gestational Age in Weeks (SD)                   | 39.23(1.42)            | 39.58(1.33)            |
| Birthweight (Kg)                                | 3.29(0.49)             | 3.55(0.49)             |
| Weight gain (Kg)                                | 6.95(1.46)             | 6.38(1.27)             |
| Time in Months of introduction of solids:       |                        |                        |
| 0-3                                             | 1(1.4%)                | 5(6.2%)                |
| 3-6                                             | 60(83.3%)              | 38(46.9%)              |
| 6-9                                             | 10(13.9%)              | 27(33.3%)              |
| 9-12                                            | 1(1.4%)                | 1(1.2%) <sup>d</sup>   |
| Time in months Since Weaning (SD)               | 8.03(3.31)             | 5.36(3.32)             |
| Ever Breastfed During First Year                |                        |                        |
| Yes                                             | 69(95.8%)              | 79(97.5%)              |
| No                                              | 3(4.2%)                | 2(2.5%)                |
| Currently Breastfed at Sample Collection Time   |                        |                        |
| Yes                                             | 31(43.1%)              | 28(34.6%)              |
| No                                              | 41(56.9%)              | 53(65.4%)              |

|                                                          |                      |                        |
|----------------------------------------------------------|----------------------|------------------------|
| Ever Formula Fed During First Year                       |                      |                        |
| Yes                                                      | 63(87.5%)            | 42(51.9%)              |
| No                                                       | 5(6.9%) <sup>c</sup> | 30(37.0%) <sup>d</sup> |
| Currently Formula Fed at Sample Collection Time          |                      |                        |
| Yes                                                      | 27(37.5%)            | 18(22.2%)              |
| No                                                       | 45(62.5%)            | 54(66.7%) <sup>d</sup> |
| Current Cow's Milk Consumption at Sample Collection Time |                      |                        |
| Yes                                                      | 47(65.3%)            | 30(37.0%)              |
| No                                                       | 23(31.9%)            | 23(28.4%)              |
| NA                                                       | 2(2.8%)              | 28(34.6%)              |

<sup>a</sup>where there is no superscript there was no missing data

<sup>b</sup>Less than 5.00% data missing

<sup>c</sup>Less than 10.00% data missing

<sup>d</sup>10–20% data missing
